# Supplementary material
Source: publisher figshare collection journal article supplement (https://frontiersin.figshare.com/ndownloader/files/14207519)
Supplement: Supplementary file 1 [file 14207519]

Sample ID	Site	Latitude	Symbiotic State	Sequencing depth	Chao1	Shannon	Faith's PD		Site key
CMeHA	Cme	40.26	Brown	16721	152.55	3.44	19.09457		Cme	Cape Mendocino
CMeHB	Cme	40.26	Brown	9497	183	4.29	21.80248		CB	Cape Blanco
CMeHC	Cme	40.26	Brown	8476	154.6	4.64	20.05638		SH	Strawberry Hill
CMeHD	Cme	40.26	Brown	49885	509.16	5.18	31.685		BB2	Boiler Bay (symbiosis collection)
CMeHE	Cme	40.26	Brown	13949	245.85	4.85	25.94292		BB	Boiler Bay (latitude collection)
CMeLA	Cme	40.26	Brown	2899	71.25	3.63	12.2241		CM	Cape Meares
CMeLB	Cme	40.26	Brown	12532	137.77	4.27	14.68624		HS	Ecola State Park
CMeLC	Cme	40.26	Brown	18438	101	3.45	14.18526		TW	Teawhit Head
CMeLD	Cme	40.26	Brown	3795	114.33	3.7	14.82523		PA	Point of Arches
CMeLE	Cme	40.26	Brown	39357	343.6	4.93	27.38327
CMeMA	Cme	40.26	Brown	8628	272.67	4.36	23.06293
CMeMB	Cme	40.26	Brown	4939	99.11	4.03	13.17702
CMeMC	Cme	40.26	Brown	9578	104.6	4.06	12.66429
CMeMD	Cme	40.26	Brown	3157	66.5	3.7	9.26334
CBHA	CB	42.83	Brown	11904	182.55	4.14	20.62045
CBHB	CB	42.83	Brown	29113	350.35	4.22	27.58495
CBHC	CB	42.83	Brown	32530	330.64	4.5	25.40466
CBHD	CB	42.83	Brown	14847	213.1	3.76	22.27512
CBHE	CB	42.83	Brown	6030	212.71	4.49	23.06124
CBLA	CB	42.83	Brown	27264	299	4.16	25.43405
CBLB	CB	42.83	Brown	43680	222	4.21	24.31364
CBLD	CB	42.83	Brown	65170	555.01	5.42	37.21236
CBLE	CB	42.83	Brown	9833	305	4.84	27.66067
CBMA	CB	42.83	Brown	12769	362.8	4.62	27.67596
CBMB	CB	42.83	Brown	4038	149.11	4.25	18.2524
CBMC	CB	42.83	Brown	50909	434.56	4.52	30.80322
CBMD	CB	42.83	Brown	7327	78.6	3.87	11.9438
CBME	CB	42.83	Brown	11299	161.1	4.08	19.35167
SHHA	SH	44.15	Brown	15124	269.67	4.65	26.35597
SHHB	SH	44.15	Brown	7621	269.14	4.72	26.4259
SHHC	SH	44.15	Brown	9384	317.78	4.79	27.37168
SHHD	SH	44.15	Brown	13267	278.02	4.57	27.41577
SHHE	SH	44.15	Brown	11322	355.89	5.11	31.2728
SHLA	SH	44.15	Brown	69999	311.92	3.56	21.31654
SHLB	SH	44.15	Brown	12258	230.04	4.47	23.35648
SHLC	SH	44.15	Brown	25018	417.57	5.25	33.39078
SHLD	SH	44.15	Brown	14599	230.5	4.53	23.74151
SHLE	SH	44.15	Brown	35799	377.78	4.82	33.0642
SHMA	SH	44.15	Brown	43760	439.36	4.6	32.93887
SHMB	SH	44.15	Brown	15791	222.32	4.49	22.56715
SHMC	SH	44.15	Brown	7574	186	4.43	20.73133
SHMD	SH	44.15	Brown	9357	274.02	4.44	26.3871
SHME	SH	44.15	Brown	2158	150.25	4.43	17.84387
BB2A1	BB2	44.49	Aposymbiotic	4954	203.15	4.09	19.61366
BB2A3	BB2	44.49	Aposymbiotic	2424	127.57	3.72	16.51108
BB2A4	BB2	44.49	Aposymbiotic	2475	102.5	3.83	14.97206
BB2A5	BB2	44.49	Aposymbiotic	14440	103.48	3.15	13.6419
BB2A6	BB2	44.49	Aposymbiotic	6489	70.55	2.87	11.09188
BB2B1	BB2	44.49	Brown	10142	278.8	4.91	27.88019
BB2B13	BB2	44.49	Brown	6277	192.1	4.37	20.58768
BB2B15	BB2	44.49	Brown	5452	150.67	4.37	20.33696
BB2B3	BB2	44.49	Brown	3131	145.75	4.13	19.88725
BB2B7	BB2	44.49	Brown	2825	85	3.34	11.58739
BB2G10	BB2	44.49	Green	5375	303.29	4.53	25.50936
BB2G11	BB2	44.49	Green	43860	441.44	4.52	27.49217
BB2G12	BB2	44.49	Green	46730	232.03	3.15	18.25264
BB2G13	BB2	44.49	Green	9532	278.09	4.53	23.79092
BB2G15	BB2	44.49	Green	13165	306.08	3.94	23.79828
BBHA	BB	44.49	Brown	5579	122.11	3.3	14.84275
BBHC	BB	44.49	Brown	17394	200.14	3.95	19.51108
BBHD	BB	44.49	Brown	29404	530.74	5.23	35.71166
BBHE	BB	44.49	Brown	3043	165.55	4.6	18.34314
BBLA	BB	44.49	Brown	7678	185.12	4.02	20.59801
BBLB	BB	44.49	Brown	62087	319.37	3.55	21.4805
BBLC	BB	44.49	Brown	46859	384	4.7	29.2619
BBLD	BB	44.49	Brown	42275	425.17	4.2	27.60577
BBLE	BB	44.49	Brown	10821	138.33	4.21	16.12279
BBMA	BB	44.49	Brown	8922	144.95	4.02	18.84476
BBMB	BB	44.49	Brown	24352	209.21	4.12	22.61575
BBMC	BB	44.49	Brown	40123	482.32	4.75	32.30978
BBMD	BB	44.49	Brown	23393	292.25	4.26	26.70808
BBME	BB	44.49	Brown	35717	323.47	4.43	27.18874
CMHA	CM	45.29	Brown	3618	71	3.36	10.74614
CMHB	CM	45.29	Brown	13413	234.75	4.48	24.99085
CMHC	CM	45.29	Brown	29003	248.12	4.38	24.67088
CMHD	CM	45.29	Brown	3940	96	3.19	14.79762
CMHE	CM	45.29	Brown	15299	256.96	4.54	24.2764
CMLA	CM	45.29	Brown	5725	90.43	3.47	12.89804
CMLB	CM	45.29	Brown	43445	421.8	3.96	27.59604
CMLC	CM	45.29	Brown	9530	211.17	4.33	25.2844
CMLD	CM	45.29	Brown	3067	132.55	4.06	16.70163
CMLE	CM	45.29	Brown	30167	250	4.02	22.60812
CMMA	CM	45.29	Brown	8560	100	3.93	14.86747
CMMB	CM	45.29	Brown	13288	221	4.21	22.33121
CMMC	CM	45.29	Brown	28736	278.93	4.2	25.1238
CMMD	CM	45.29	Brown	20104	264.66	3.96	24.64915
CMME	CM	45.29	Brown	17335	345.47	4.97	30.2439
HSHA	HS	45.93	Brown	5165	102.88	4.15	15.02025
HSHB	HS	45.93	Brown	4283	206.04	4.6	22.22533
HSHC	HS	45.93	Brown	3663	146.5	4.2	19.47312
HSHD	HS	45.93	Brown	5536	199.18	4.38	23.33905
HSHE	HS	45.93	Brown	25793	308.21	3.18	24.05658
HSLA	HS	45.93	Brown	25472	516.69	4.83	34.48593
HSLB	HS	45.93	Brown	6767	128.11	4.44	17.04691
HSLC	HS	45.93	Brown	67185	385.73	4.16	24.97468
HSLD	HS	45.93	Brown	5464	142.2	3.56	14.635
HSLE	HS	45.93	Brown	6293	266.5	4.87	27.22624
HSMA	HS	45.93	Brown	8626	196.9	4.36	20.8026
HSMB	HS	45.93	Brown	21541	326.23	4.39	26.66723
HSMC	HS	45.93	Brown	40751	238.34	3.73	20.05296
HSMD	HS	45.93	Brown	20282	344.89	4.79	29.40641
HSME	HS	45.93	Brown	18793	364.3	4.21	24.88543
TWHA	TW	47.52	Brown	5989	160.18	4.36	19.53662
TWLA	TW	47.52	Brown	3327	110.11	3.69	15.65822
TWLD	TW	47.52	Brown	10937	212.97	3.98	22.41559
TWMA	TW	47.52	Brown	6252	172.26	3.74	19.59271
TWMB	TW	47.52	Brown	7248	300.89	4.87	27.7978
TWMC	TW	47.52	Brown	3934	114.88	4.27	15.06696
TWMD	TW	47.52	Brown	6389	299.04	4.8	26.78361
PAHB	PA	48.14	Brown	9006	277.14	4.4	25.5653
PAHC	PA	48.14	Brown	14213	322.6	4.89	30.71382
PAHD	PA	48.14	Brown	7938	183.21	4.47	21.46624
PAHE	PA	48.14	Brown	11573	266.02	4.74	26.1819
PALA	PA	48.14	Brown	5704	179.14	3.78	19.5328
PALB	PA	48.14	Brown	11010	235.12	4.36	25.57064
PALC	PA	48.14	Brown	17555	406.13	4.89	33.11546
PALD	PA	48.14	Brown	4234	215.5	4.61	24.61111
PALE	PA	48.14	Brown	13711	268.06	4.46	26.23331
PAMA	PA	48.14	Brown	6263	203.87	4.68	22.52937
PAMB	PA	48.14	Brown	6295	198.68	4.35	21.13044
PAMC	PA	48.14	Brown	11970	238.43	4.54	24.52594
PAMD	PA	48.14	Brown	6288	74	3.34	11.34879
PAME	PA	48.14	Brown	5400	56	3.52	9.30668
